# Supplementary material for: The importance of spodium bonds, H-bonds and π-stacking interactions in the solid state structures of four zinc complexes with tetradentate secondary diamine ligands
Source: Royal Society of Chemistry journal article supplement (doi:10.1039/d2nj05490f), 2023-01-01
Supplement: d2nj05490f1.pdf [file d2nj05490f1.pdf]

## Electronic Supplementary Information

### The importance of spodium bonds, H-bonds and $\pi$ -stacking interactions in the solid state structures of four zinc complexes with tetradentate secondary diamine ligand

Puspendu Middya<sup>a</sup>, Mainak Karmakar<sup>a</sup>, Rosa M. Gomila<sup>b</sup>, Michael G. B. Drew<sup>c</sup>, Antonio Frontera<sup>b,\*</sup> and Shouvik Chattopadhyay<sup>\*</sup>

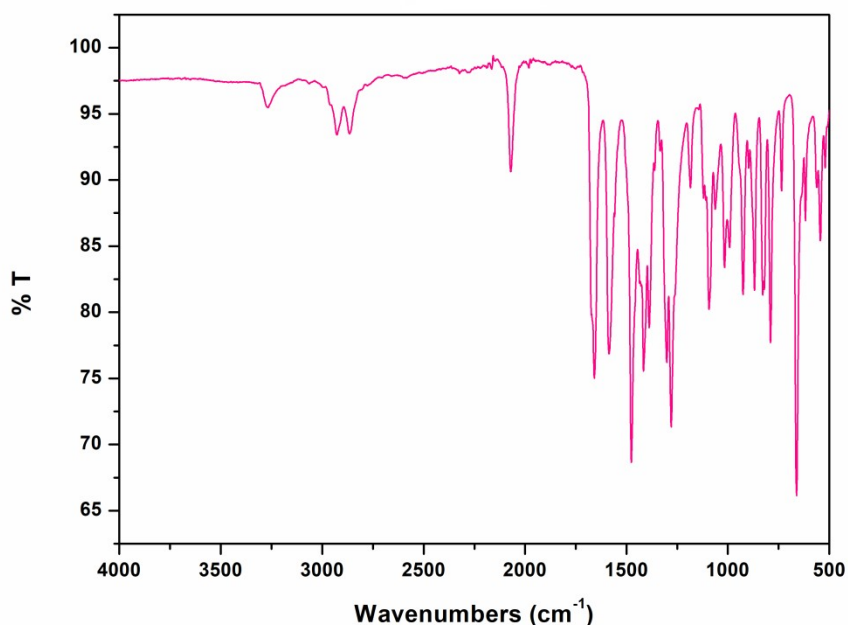

Figure S1. IR spectrum of complex 1.

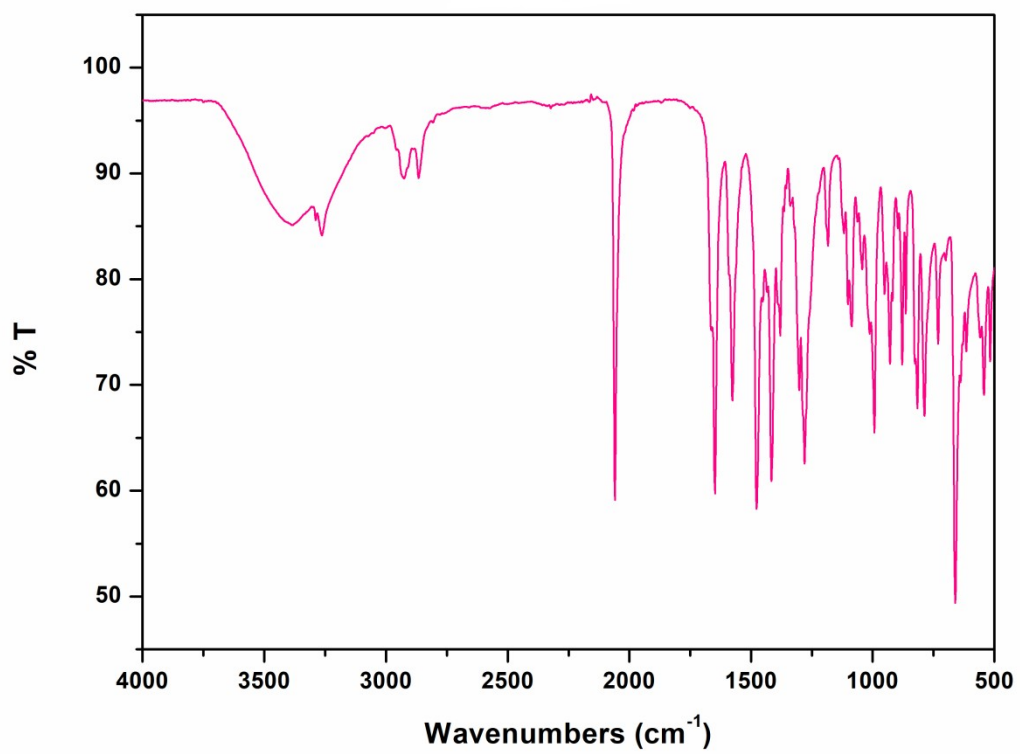

**Figure S2.** IR spectrum of complex 2.

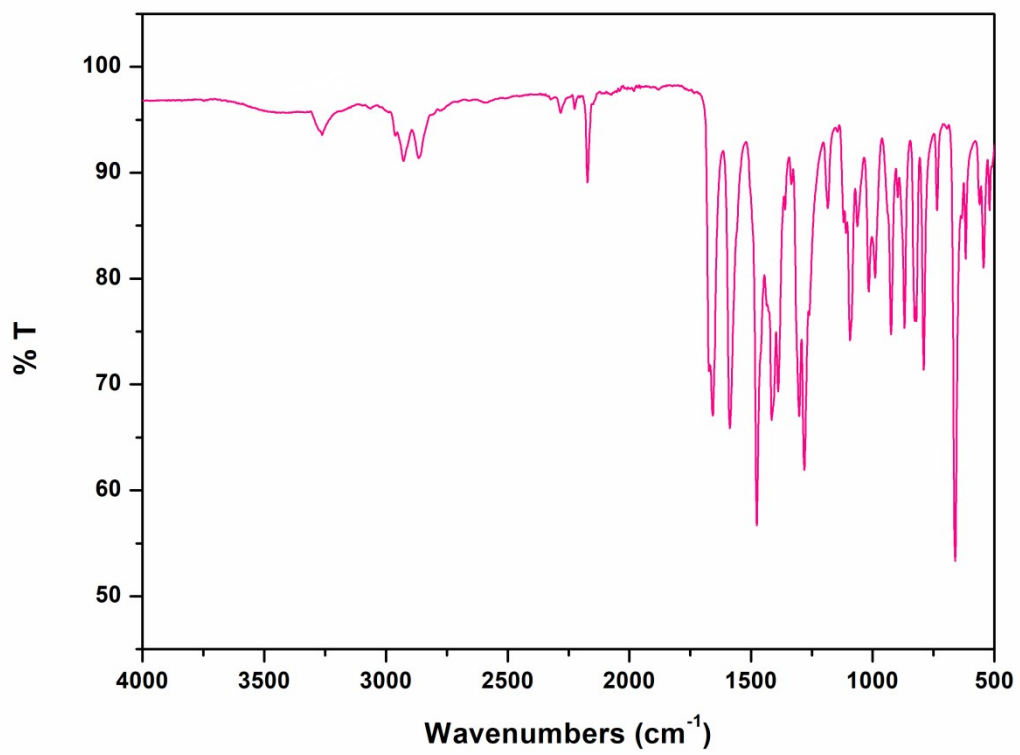

**Figure S3.** IR spectrum of complex 3.

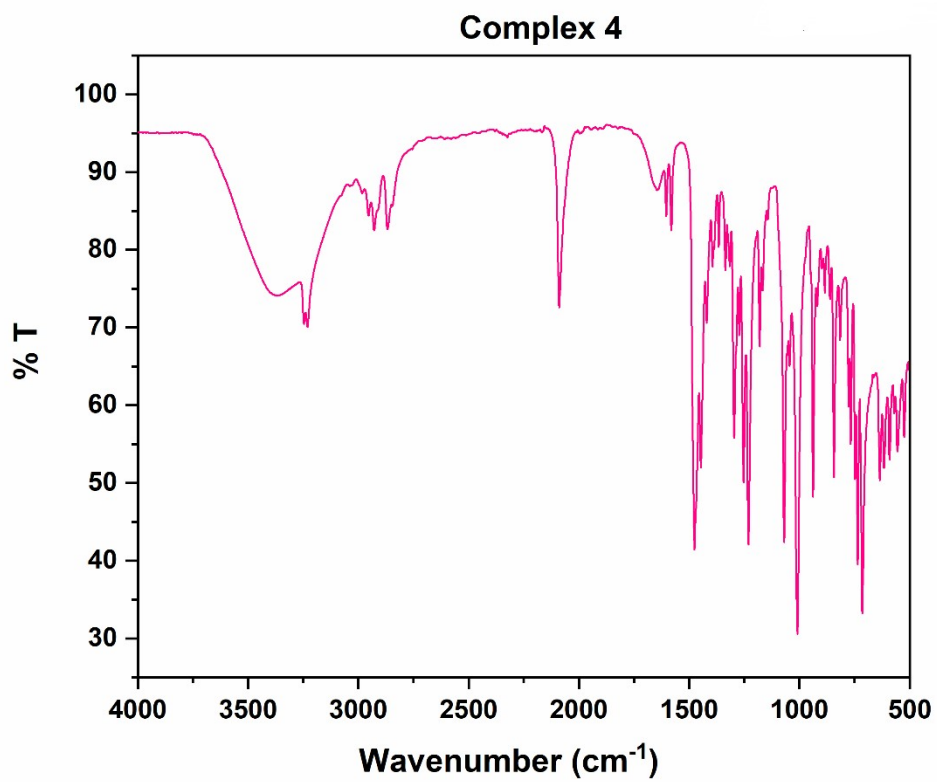

**Figure S4.** IR spectrum of complex 4.

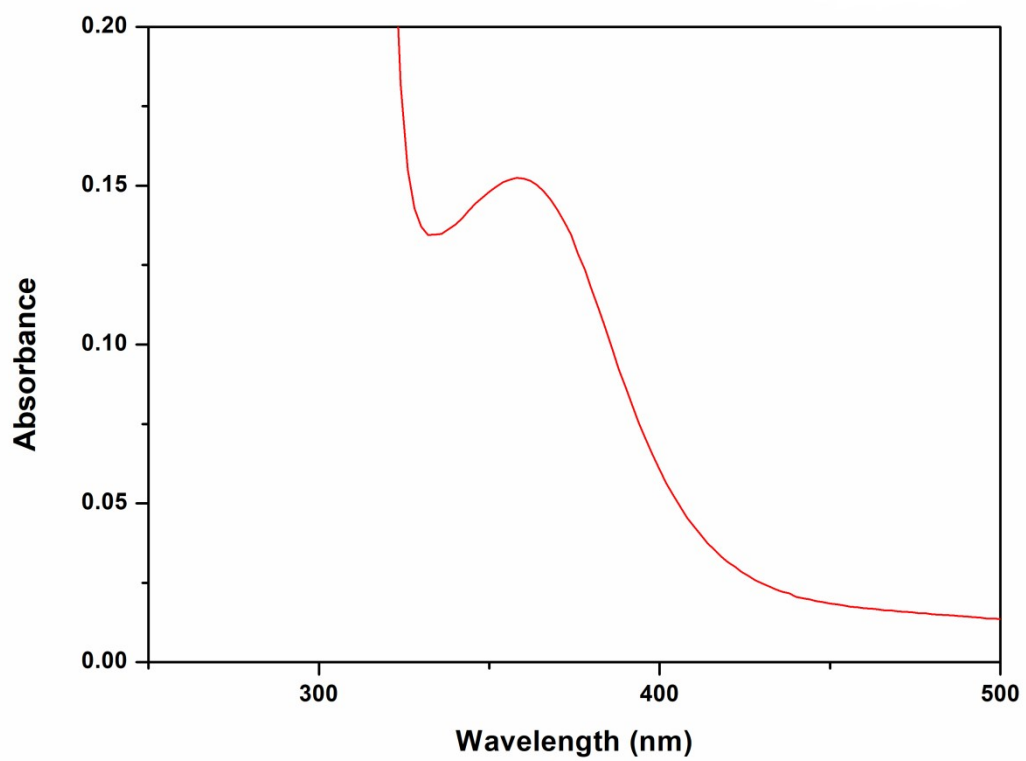

**Figure S5.** Electronic spectrum of complex 1.

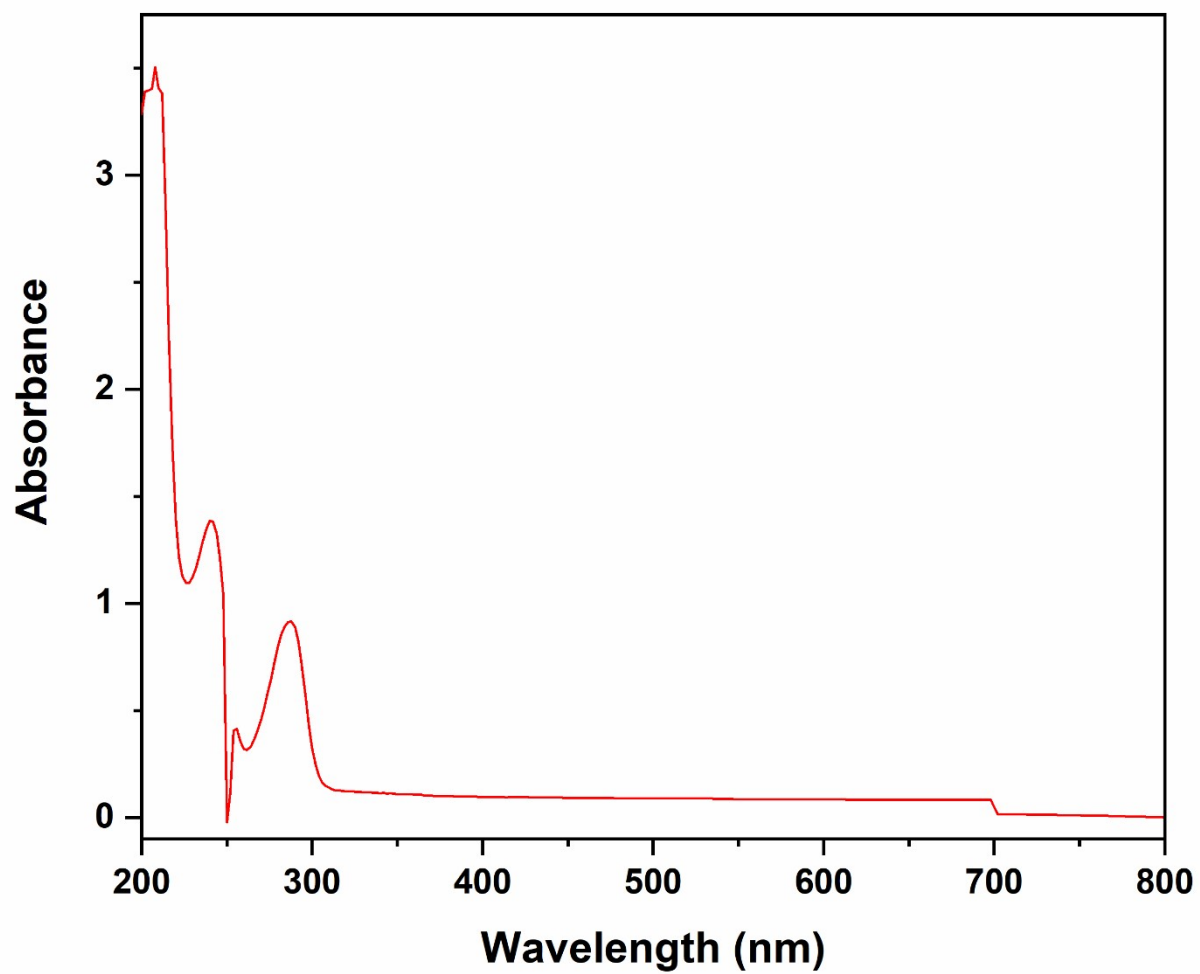

Figure S6. Electronic spectrum of complex 4.

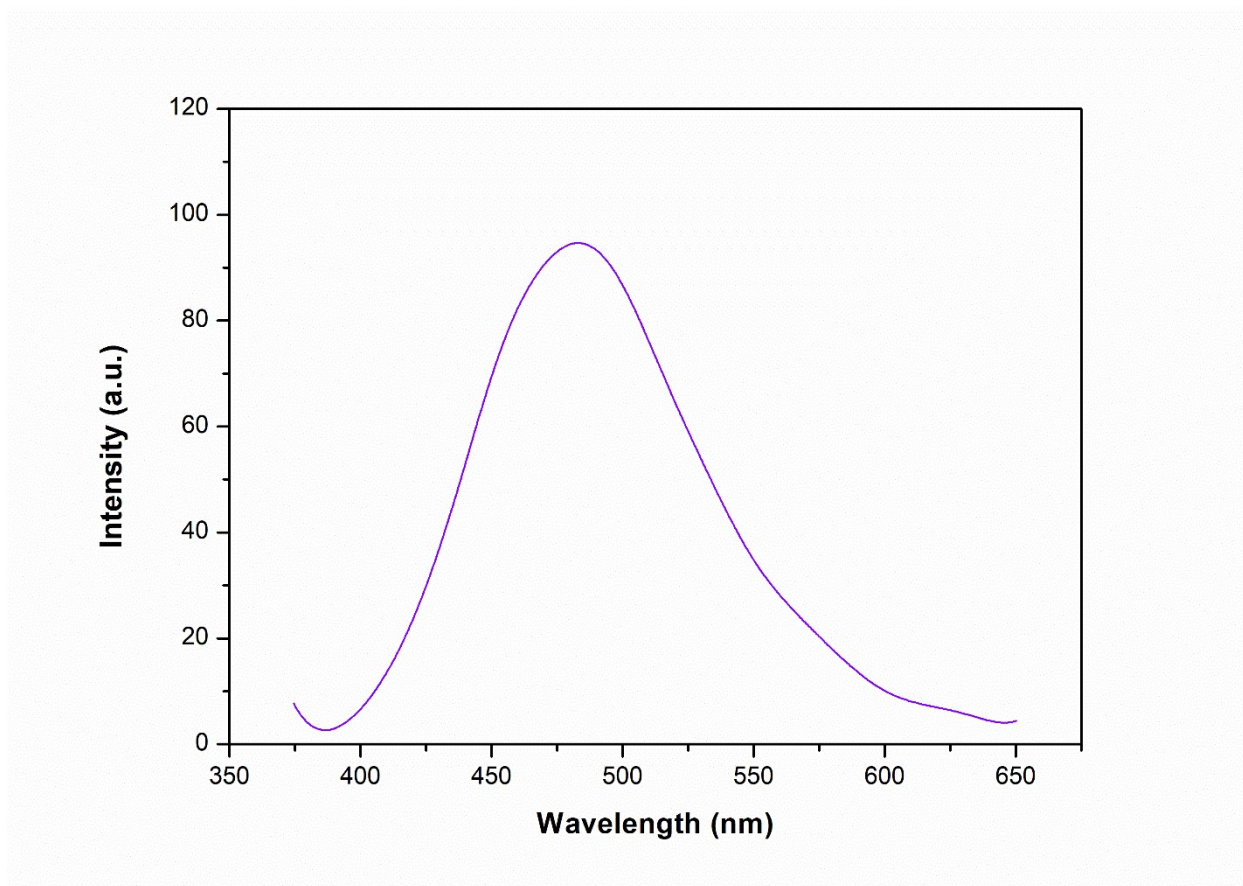

**Figure S7.** Fluorescence spectrum of complex **1**. Excitation wavelength 365 nm.

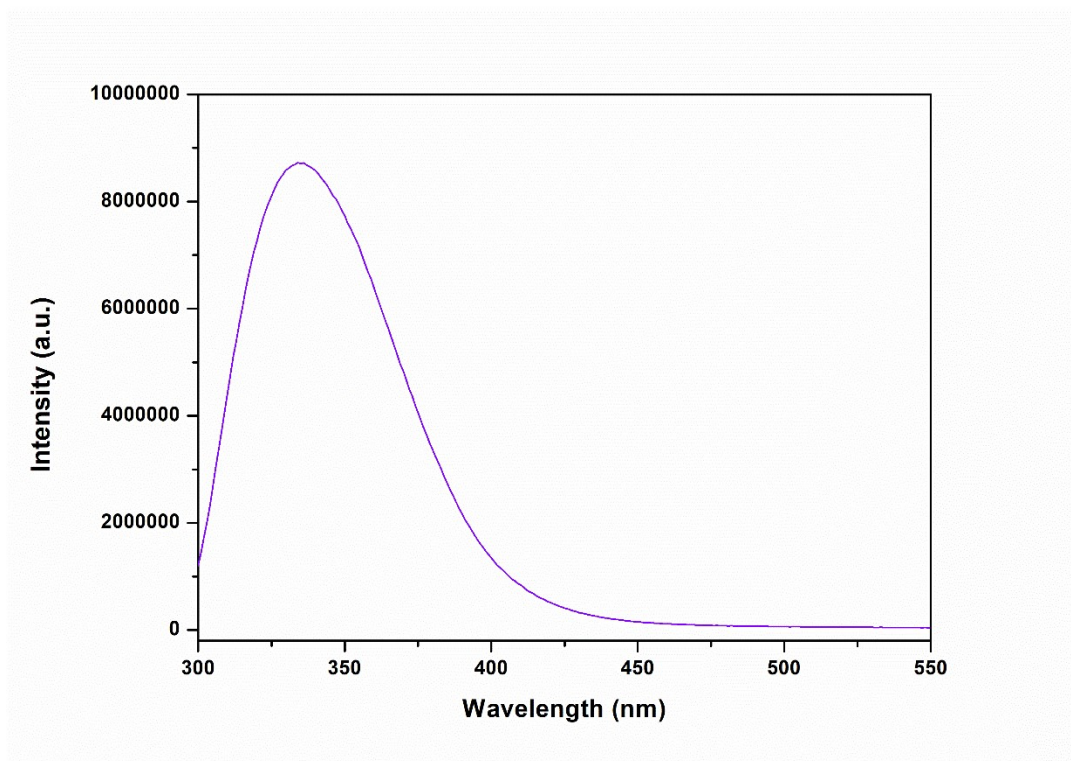

**Figure S8.** Fluorescence spectrum of complex 4. Excitation wavelength 287 nm.



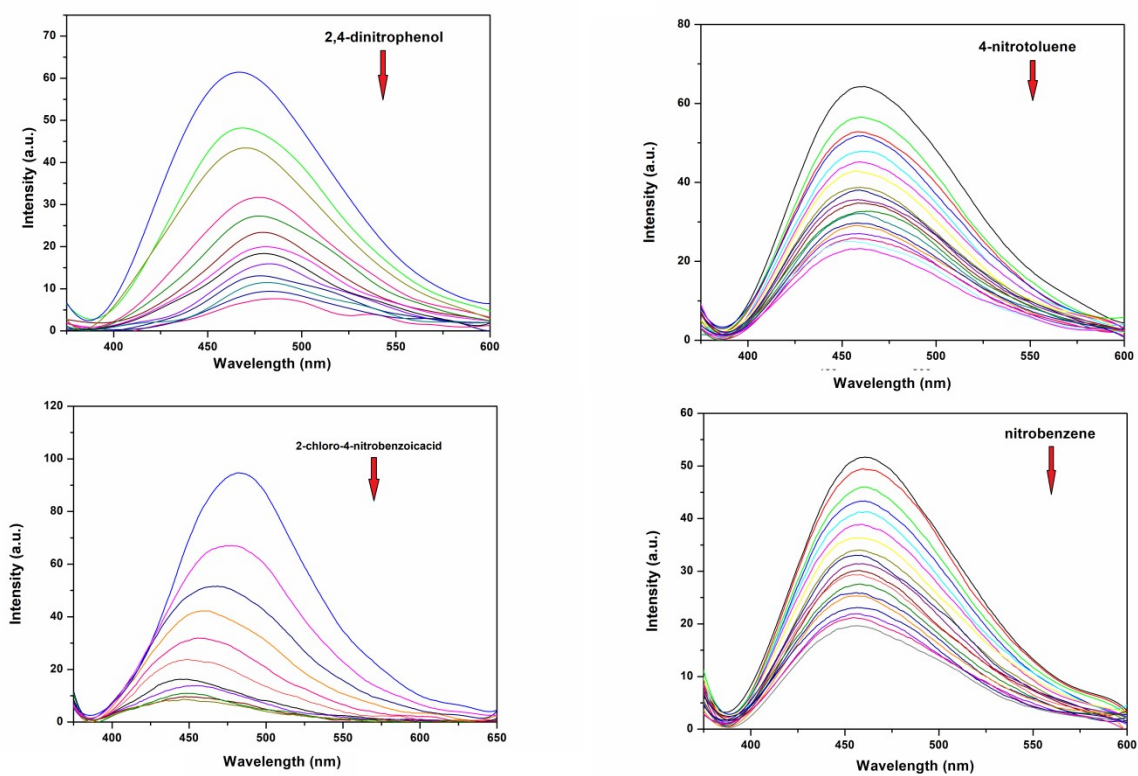

**Figure S9.** Gradual decrease of fluorescence intensity of complex 1 on adding different quenchers.

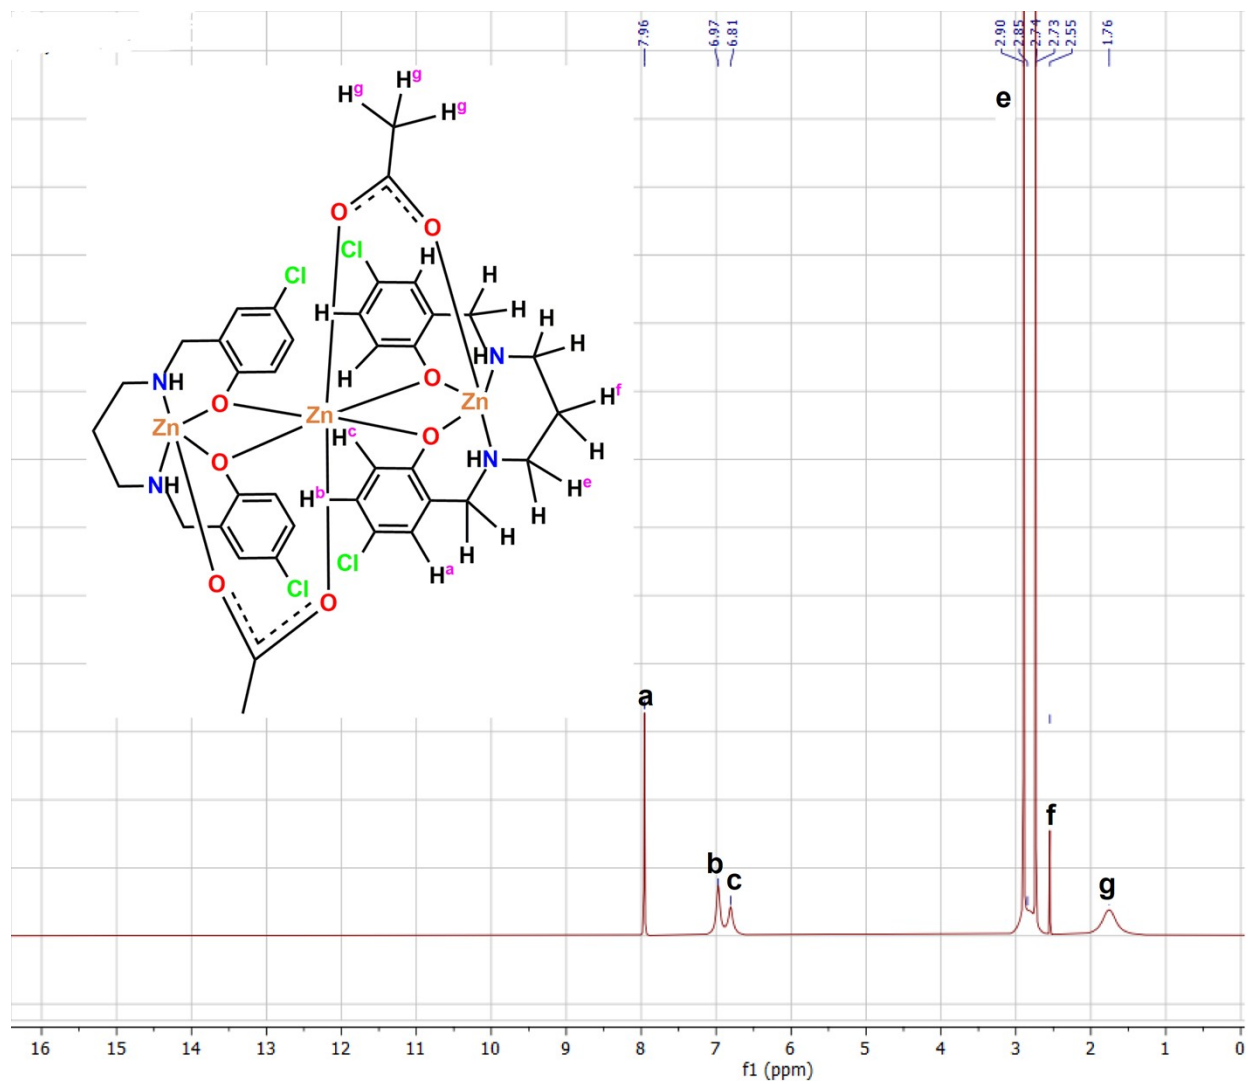

**Figure S10.**  $^1\text{H}$  NMR spectrum of complex 1.

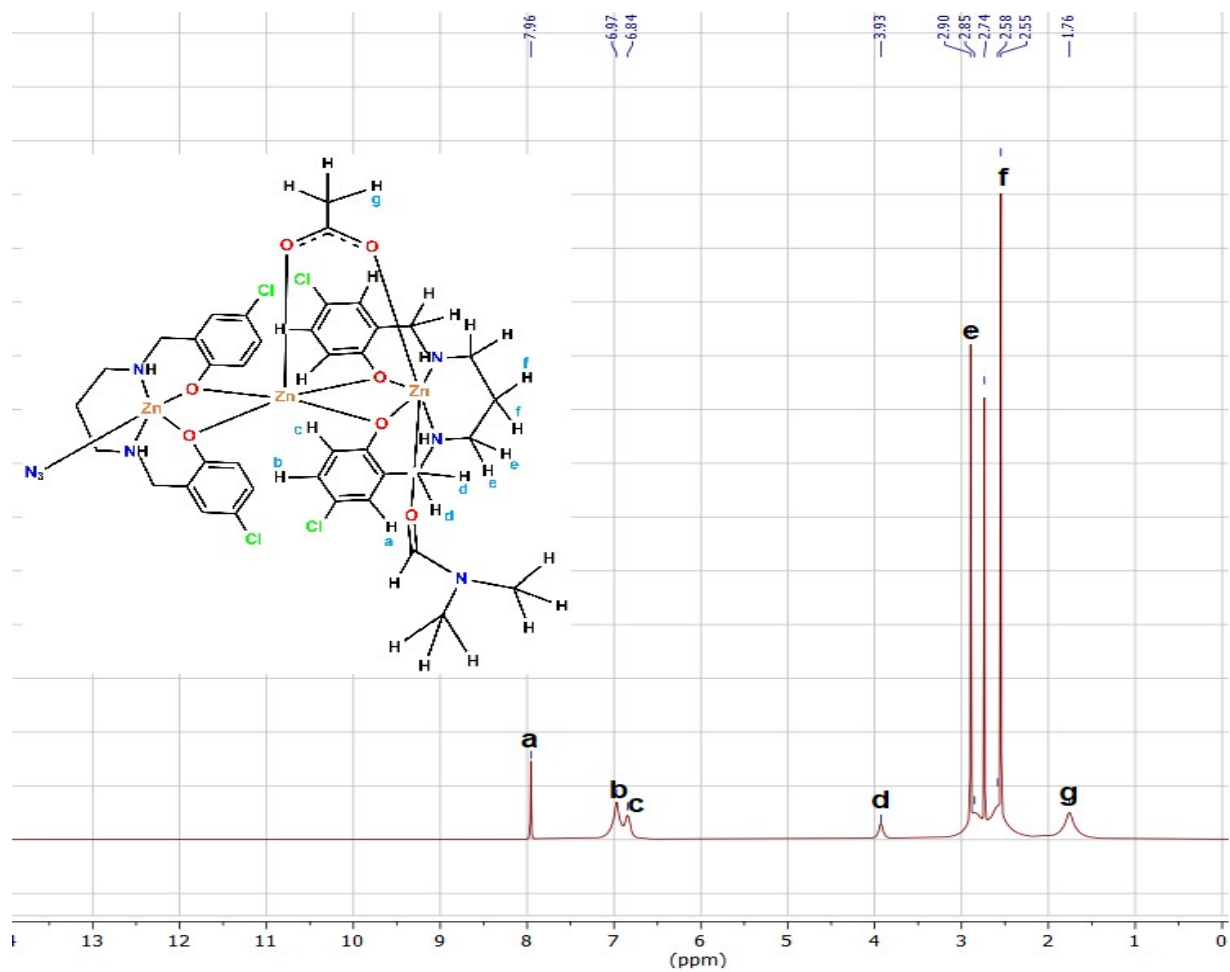

**Figure S11.** <sup>1</sup>H NMR spectrum of complex 2.

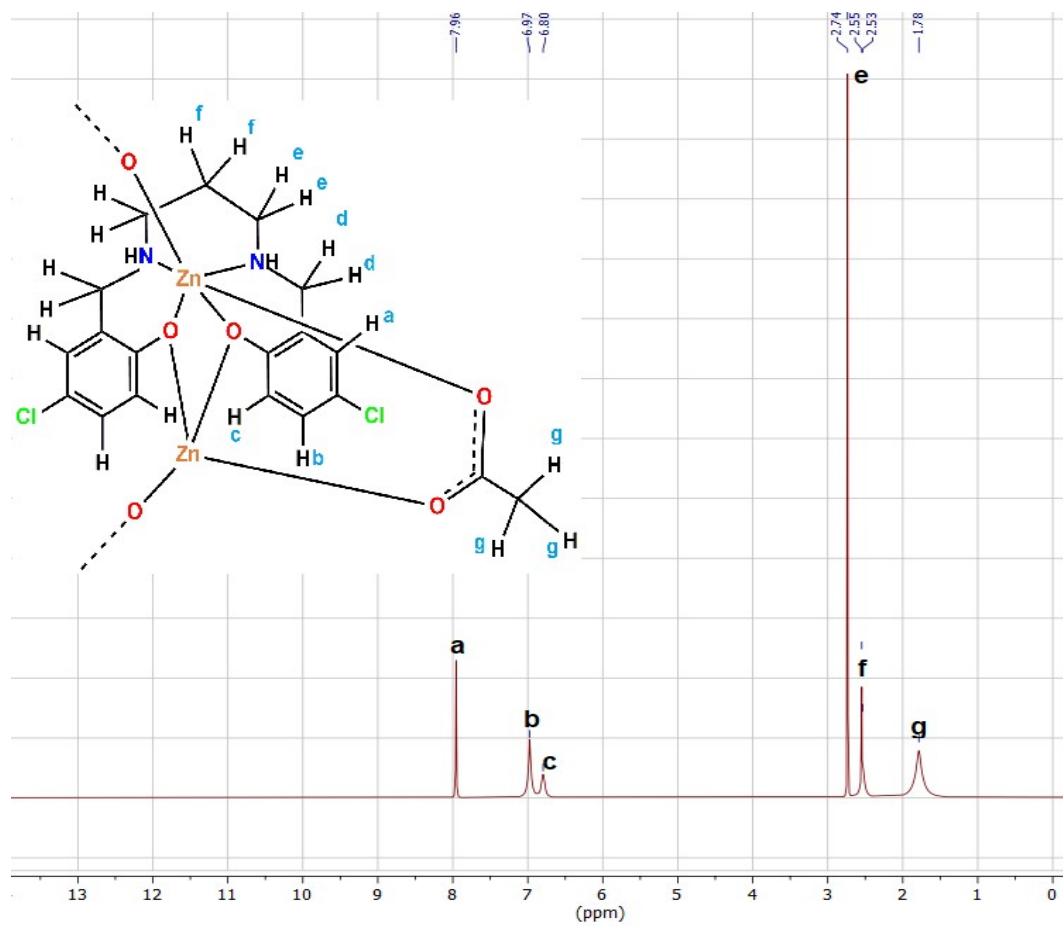

**Figure S12.**  $^1\text{H}$  NMR spectrum of complex 3.

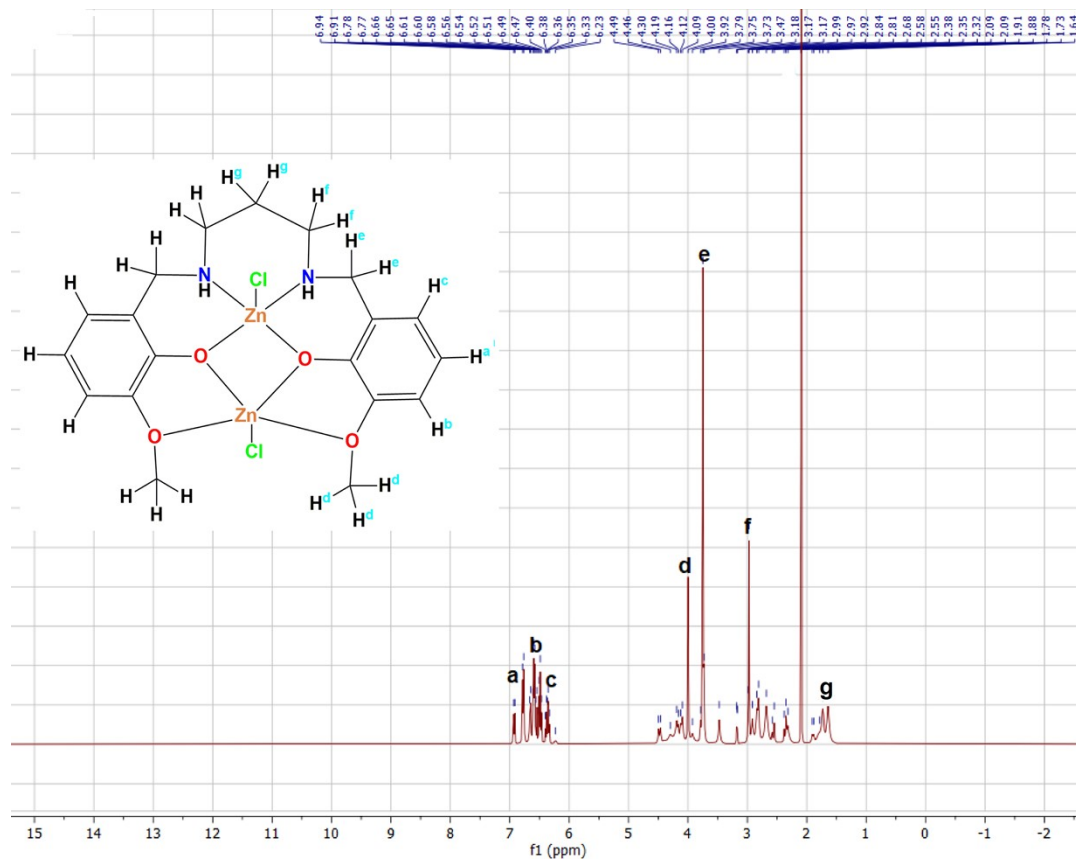

**Figure S13.** <sup>1</sup>H NMR spectrum of complex 4.

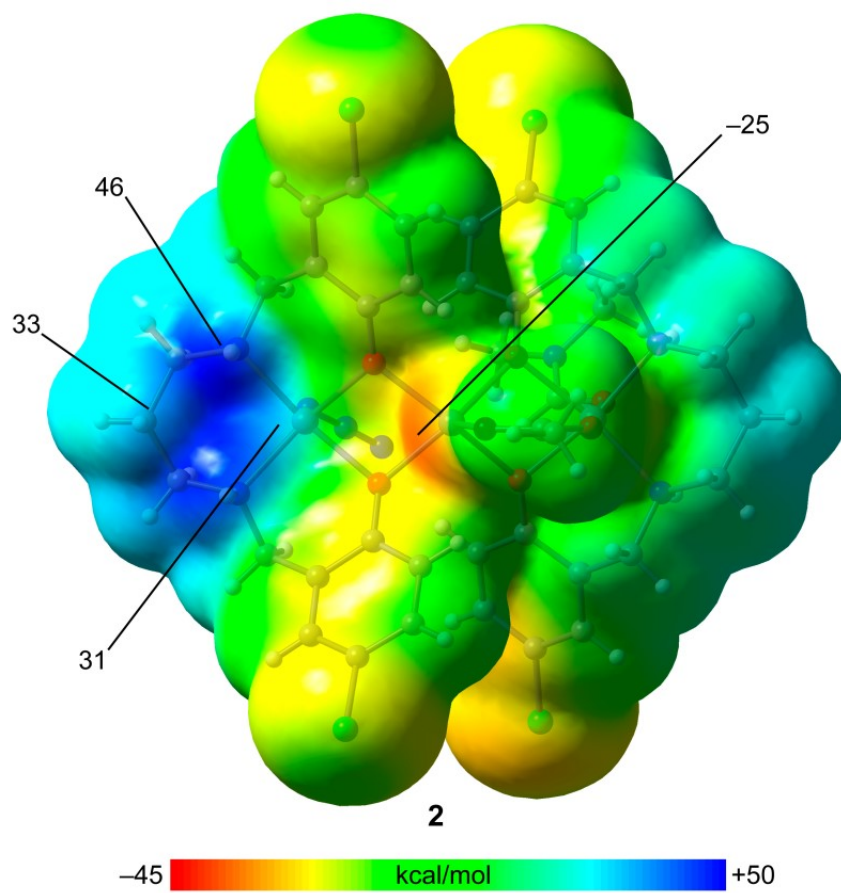

**Figure S14.** MEP surfaces of complex **2** at the RI-BP86-D3/def2-TZVp level of theory. The energies at selected points of the surfaces are given in kcal/mol. Isosurface 0.001 a.u.
